# Supplementary material for: The discovery of conductive ionic bonds in NiO/Ni transparent counter electrodes for electrochromic smart windows with an ultra-long cycling life
Source: Royal Society of Chemistry journal article supplement (doi:10.1039/d1ma00384d), 2021-01-01
Supplement: d1ma00384d1.pdf [file d1ma00384d1.pdf]

## The discovery of conductive ionic bond in NiO/Ni transparent counter electrode for electrochromic smart windows of ultra-long cycle life

Qi Zhao,<sup>1</sup> Jinkai Wang,<sup>1</sup> Yuanyuan Cui,<sup>1</sup> Xinghui Ai,<sup>1</sup> Zhang Chen,<sup>1</sup> Chuanxiang Cao,<sup>1</sup> Feng Xu,<sup>2\*</sup> Yanfeng Gao<sup>1\*</sup>

*1 School of Materials Science and Engineering, Shanghai University, 99 Shangda Rd., Shanghai, 200444 China*

*2 Beijing Key Laboratory of Lignocellulosic Chemistry, Beijing Forestry University, Beijing 100083 China*

\*Corresponding author: Feng Xu, Email: [xfx315@bjfu.edu.cn](mailto:xfx315@bjfu.edu.cn); Yanfeng Gao, Email: [yfgao@shu.edu.cn](mailto:yfgao@shu.edu.cn)

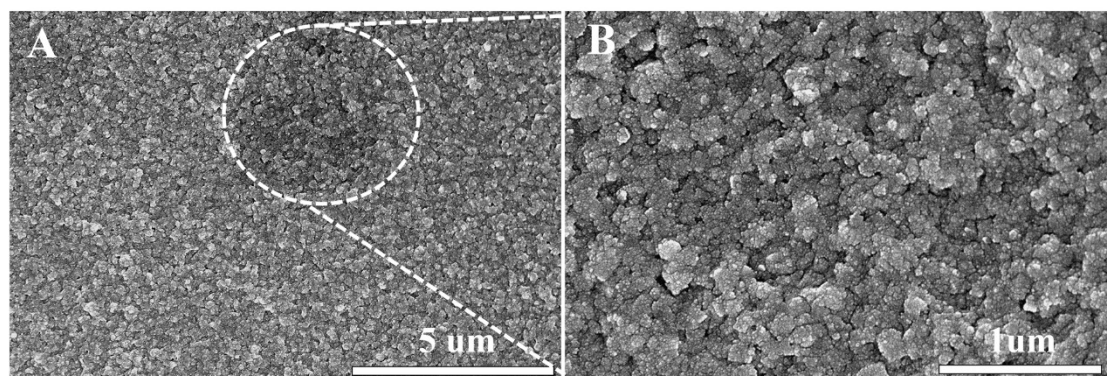

**Fig. S1.** (A) SEM image of NiO/Ni films with low magnification. (B) Corresponding high magnification.

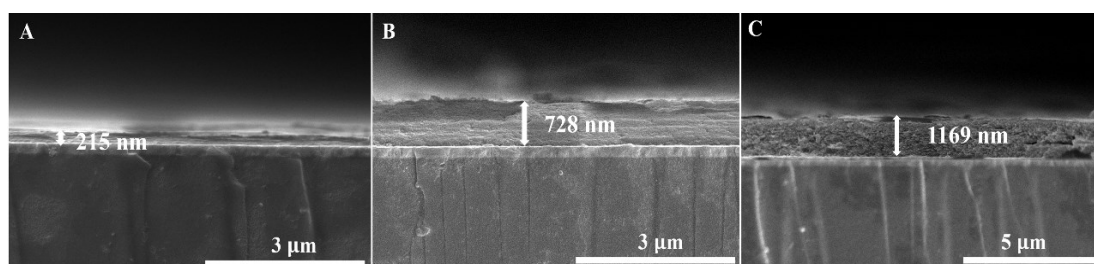

**Fig. S2.** Cross sectional SEM images of the as-prepared NiO/ Ni-1 (a), NiO/ Ni-2 (b), NiO/ Ni-3 (c) films.

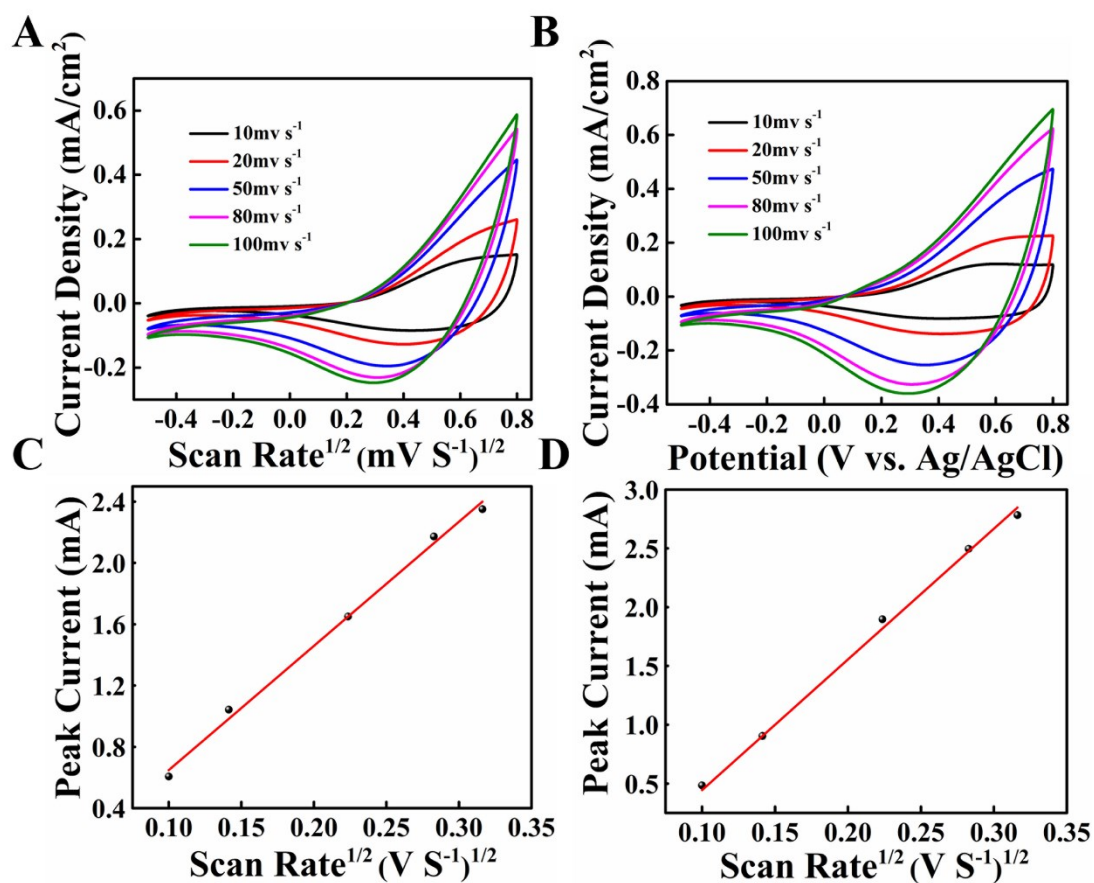

**Fig. S3.** Cyclic voltammograms of (A) NiO/Ni-2 and (B) NiO/Ni-3 films at different scan rates (10 mV s<sup>-1</sup>, 20 mV s<sup>-1</sup>, 50 mV s<sup>-1</sup>, 80 mV s<sup>-1</sup>, 100 mV s<sup>-1</sup>) in the voltage windows of -0.5V to +0.8V. The ion diffusion coefficient of (C) NiO/Ni-2 and (D) NiO/Ni-3 calculated by the Randles-Sevcik law.

#### S4. Diffusion coefficient.

The ion diffusion coefficient (D) obeys the Randles-Sevcik law:

$$I_p = 2.72 \times 10^5 \times n^{3/2} \times A \times D^{1/2} \times C_0 \times V^{1/2}$$

where  $I_p$  is the peak current (A),  $n$  is the number of electrons (1),  $A$  is the working electrode area ( $\text{cm}^2$ ),  $C_0$  is the concentration of electrolyte ( $\text{mol cm}^{-3}$ ) and  $V$  is the scan rate ( $\text{mV s}^{-1}$ ).

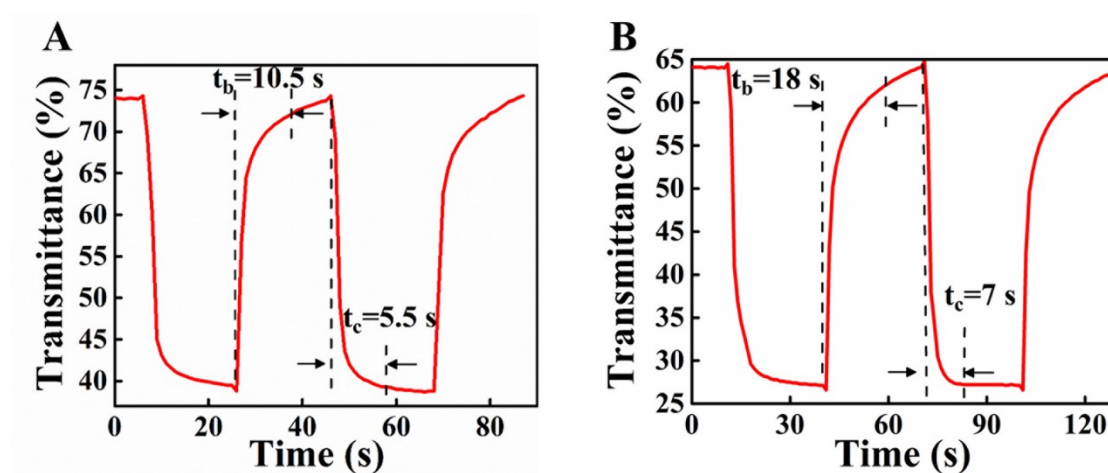

**Fig. S5.** Real-time transmittance spectra at 550 nm in the -0.5/+0.8 V voltage window (with time interval of 20 s and 30 s for NiO/ Ni-2 (A) and NiO/ Ni-3 (B), respectively).

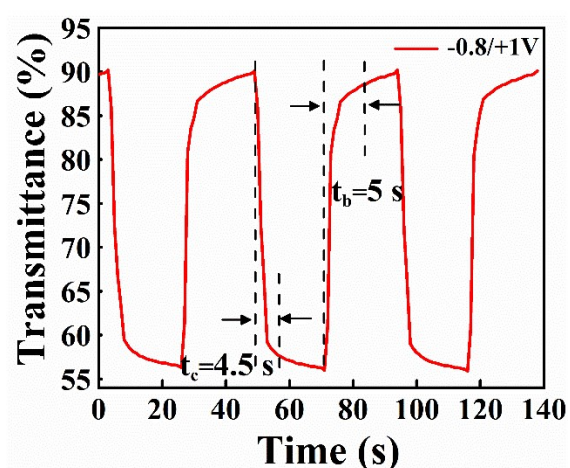

**Fig. S6.** Real-time transmittance spectra at 550 nm in the -0.8/+1 V voltage window for NiO/Ni-1 films.

### S7. The calculation of coloration efficiency (CE)

It can be calculated by the following equation:

$$CE = \Delta OD / \Delta Q = [\log (T_b / T_c)] / (Q/A)$$

where A is the surface area, and  $T_b$  and  $T_c$  refer to the transmittance of film in the bleached and colored states, respectively.

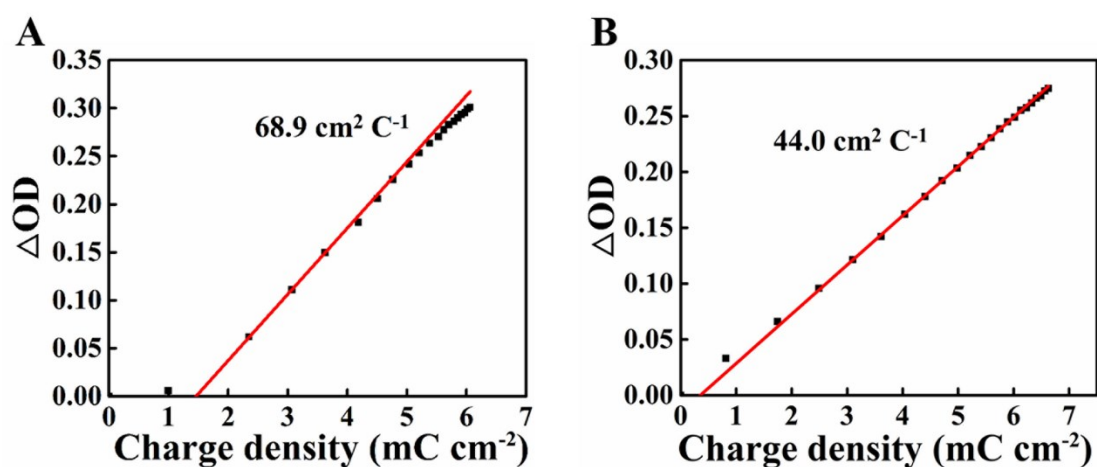

Fig. S8. Changes in optical density (at 550nm) with respect to the injected charge density for NiO/ Ni-2 (A) and NiO/ Ni-3 (B).

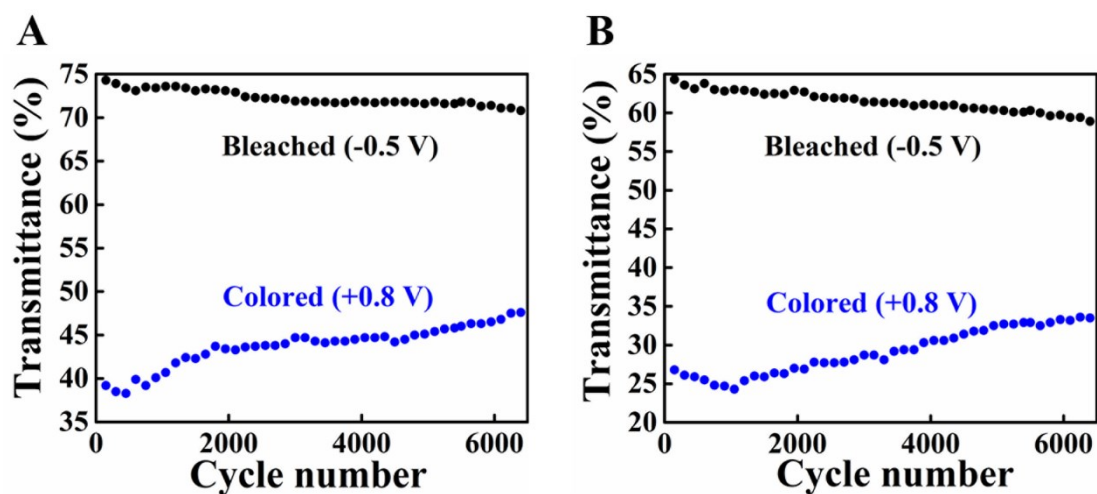

Fig. S9. Cycle performance recorded in situ changes of transmittance at 550 nm for the

samples of NiO/ Ni-2 (A) and NiO/Ni-3 (B).

**Table S1.** Other types of electrochromic films from literature

| <b>Materials</b>                             | <b>Film preparation method</b> | <b>Cycle Times</b> |
|----------------------------------------------|--------------------------------|--------------------|
| WO <sub>3</sub> (nanowire) <sup>1</sup>      | Hydrothermal                   | 1000               |
| WO <sub>3</sub> (mesoporous) <sup>2</sup>    | Sputtering                     | 2000               |
| WO <sub>3</sub> (quantum dots) <sup>3</sup>  | Spin-coating                   | 50                 |
| W <sub>18</sub> O <sub>49</sub> <sup>4</sup> | Spin-coating                   | 2000               |
| WO <sub>3</sub> /PEDOT <sup>5</sup>          | Inkjet-printing                | 1000               |
| TiO <sub>2-x</sub> <sup>6</sup>              | Spin-coating                   | 2000               |
| PANI <sup>7</sup>                            | Electrodeposition              | 500                |
| P3HT <sup>8</sup>                            | Roll-to roll                   | 2000               |

**Table S2** Summary of the EC properties obtained from all the samples at 550 nm, including transmittance modulation ( $\Delta T$ ), coloration time ( $t_c$ ), bleaching time ( $t_b$ ) and coloration efficiency (CE), and  $T_b$  represents the transmittance in bleached states.

| <b>Samples</b> | <b>Cycle Times</b>      | <b><math>T_b</math> (%)</b> | <b><math>\Delta T</math> (%)</b> | <b><math>t_c</math> (s)</b> | <b><math>t_b</math> (s)</b> | <b>CE (cm<sup>2</sup> C<sup>-1</sup>)</b> |
|----------------|-------------------------|-----------------------------|----------------------------------|-----------------------------|-----------------------------|-------------------------------------------|
| NiO/Ni-1       | 10000<br>(retain 87.0%) | 90.1                        | 32.2                             | 4.5                         | 5                           | 88.1                                      |
| NiO/Ni-2       | 6400<br>(retain 66.1%)  | 74.3                        | 35.5                             | 10.5                        | 5.5                         | 68.9                                      |
| NiO/Ni-3       | 6400<br>(retain 67.6%)  | 64.5                        | 37.9                             | 18                          | 7                           | 44.0                                      |

## References

1. J. Zhang, J.-p. Tu, X.-h. Xia, X.-l. Wang and C.-d. Gu, *Journal of Materials Chemistry*, 2011, **21**, 5492-5498.
2. J. Z. Ou, S. Balendhran, M. R. Field, D. G. McCulloch, A. S. Zoolfakar, R. A. Rani, S. Zhuiykov, A. P. O'Mullane and K. Kalantar-Zadeh, *Nanoscale*, 2012, **4**, 5980-5988.
3. S. Cong, Y. Tian, Q. Li, Z. Zhao and F. Geng, *Advanced Materials*, 2014, **26**, 4260-4267.
4. S. Zhang, S. Cao, T. Zhang, A. Fisher and J. Y. Lee, *Energy & Environmental Science*, 2018, **11**, 2884-2892.
5. G. Cai, X. Cheng, M. Layani, A. W. M. Tan, S. Li, A. L.-S. Eh, D. Gao, S. Magdassi and P. S. Lee, *Nano Energy*, 2018, **49**, 147-154.
6. S. Zhang, S. Cao, T. Zhang and J. Y. Lee, *Advanced Materials*, 2020, **32**, 2004686.
7. K. Zhou, H. Wang, J. Jiu, J. Liu, H. Yan and K. Suganuma, *Chemical Engineering Journal*, 2018, **345**, 290-299.
8. S. H. Park, S. M. Lee, E. H. Ko, T. H. Kim, Y. C. Nah, S. J. Lee, J. H. Lee and H. K. Kim, *Sci Rep*, 2016, **6**, 33868.
